# Supplementary material for: Effect of Quorum Sensing Molecule Farnesol on Mixed Biofilms of Candida albicans and Staphylococcus aureus
Source: MDPI journal article supplement (doi:10.3390/antibiotics12030441), 2023-02-23
Supplement: s1 [file s1]

## Supplementary Materials

# Effect of Quorum Sensing Molecule Farnesol on Mixed Biofilms of *Candida albicans* and *Staphylococcus aureus*

Barbora Gaálová-Radochová <sup>1,\*</sup>, Samuel Kendra <sup>1</sup>, Luisa Jordao <sup>2</sup>, Laura Kursawe <sup>3,4</sup>, Judith Kikhney <sup>3,4</sup>, Annette Moter <sup>3,4,5</sup> and Helena Bujdáková <sup>1</sup>

<sup>1</sup> Department of Microbiology and Virology, Faculty of Natural Sciences, Comenius University in Bratislava, Ilkovičova 6, 842 15 Bratislava, Slovakia

<sup>2</sup> Department of Environmental Health, Research and Development Unit, National Institute of Health Dr Ricardo Jorge (INSA), Av Padre Cruz, 1649-016 Lisboa, Portugal

<sup>3</sup> Biofilmcenter, Institute of Microbiology, Infectious Diseases and Immunology, Charité—Universitätsmedizin Berlin, Hindenburgdamm 30, 12203 Berlin, Germany

<sup>4</sup> MoKi Analytics GmbH, Charité-Universitätsmedizin Berlin, Hindenburgdamm 30, 12203 Berlin, Germany

<sup>5</sup> Moter Diagnostics, Marienplatz 9, 12207 Berlin, Germany

\* Correspondence: barbora.gaalova@uniba.sk; Tel.: +421-2-9014-9480

### Phenotype identification of *Candida albicans*

The standard strain of *Candida albicans* was verified by the growth on CHROMagar Candida (Liofilchem, Italy), cultivated at 48 h at 37 °C. The selective medium was inoculated by a volume of 20 µL of an overnight yeast culture.

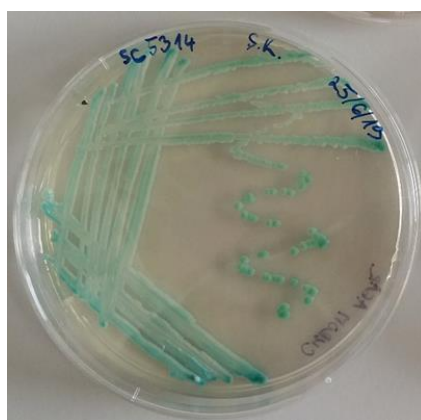

**Figure S1.** Specific growth of *C. albicans* SC 5314 on CHROMagar Candida.

### Phenotype and genotype identification of *Staphylococcus aureus* isolates

The *S. aureus* strains were re-identified using different phenotypic and genotypic methods. For phenotype identification of strains, the Petri dish with Mannitol Salt Agar (Biolife, Italy) was inoculated by a volume of 20 µL of an overnight bacterial culture. After 24 h cultivation at 37 °C, the morphology of colonies and change of the agar color due to the fermentation of mannitol were considered. Beta-hemolysis on Columbia blood agar with 5% of sheep blood (BD, USA) was confirmed in all isolates. Growth curves of each isolate were prepared after adjustment of overnight bacterial culture in Mueller Hinton Broth (MHB) to OD<sub>600</sub> 0.01 and measured every 30 minutes. The results of phenotype characterization of isolates are shown in **Figure S2**.

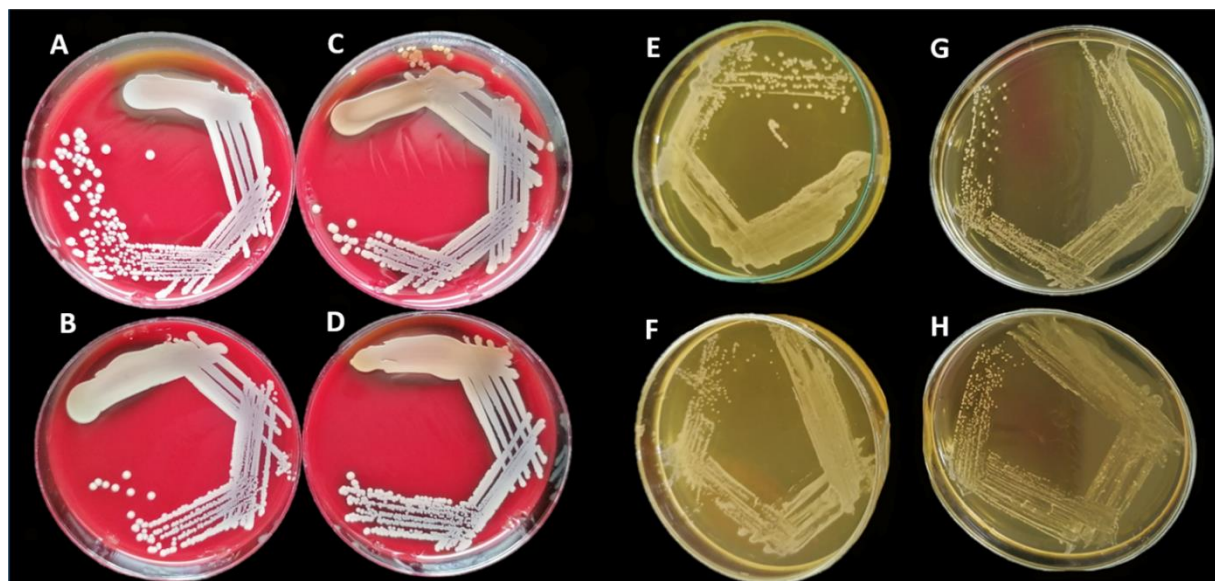

**Figure S2.** Phenotypic identification and growth curves of *S. aureus* isolates: upper image: A) *S. aureus* CCM 3953; B) *S. aureus* DRA; C) *S. aureus* DHN; D) *S. aureus* L18 (Columbia blood agar with 5% of sheep blood); E) *S. aureus* CCM 3953; F) *S. aureus* L18; G) *S. aureus* DRA; H) *S. aureus* DHN (Mannitol Salt Agar). The graph below documents the growth curves of *S. aureus* isolates achieved by measuring of optical density (OD<sub>600</sub>) of suspension in 30 min intervals.

Genotypic identification of *S. aureus* isolates included polymerase chain reaction (PCR) of species-specific regulator of methicillin resistance (*femA* gene). Isolates were divided according to the presence of *mecA* gene, the key factor of PBP2a production, to methicillin-sensitive and methicillin-resistant. For determination of resistance to fluoroquinolones, efflux pumps coded by *NorA*, *norB* and *norC* genes were monitored. From the group of aminoglycoside modification enzymes, genes of *ant(4')-Ia*, *aph(3')-III* and *aac(6')-aph(2'')* were tested. Ribosomal binding site modification, which can be associated with resistance to macrolides, streptogramins and lincosamides, was monitored by detection of the *ermA*, *ermB* and *ermC* genes (erythromycin ribosome methylases) and efflux pumps *msrA* and *msrB*.

Genomic DNA was isolated with HigherPurity™ Bacterial Genomic DNA Isolation Kit according to the manufacturer's instructions (CanvaxBiotech, Spain). Oligonucleotide primer sequences and their properties are listed below (**Table S1**).

The total volume of the reaction was 20  $\mu$ L and consisted of 4  $\mu$ L 5x FIREPol® Master Mix (Solis BioDyne, Estonia), 1  $\mu$ L (0.01 – 10 ng/ $\mu$ L) of template DNA, 0.5  $\mu$ L of 10 pM Forward primer, 0.5  $\mu$ L of 10 pM Reverse primer and 14  $\mu$ L Nuclease-free water. The PCR reaction was performed in an iCycler Thermal Cycler (BIORAD, USA). As a negative control, Nuclease-free water was used. The PCR temperature cycling conditions for *femA* were as follows: initial denaturation at 95 °C for 15 min; followed by 34 cycles of denaturation at 95 °C for 20 sec, annealing at 54.7 °C for 1 min, and elongation at 72 °C for 1 min. The final cycle was followed by an extension at 72 °C for 10 min.

For *mecA* the program was the same, only the annealing temperature differed.

Visualization of PCR products was performed in 1.5% agarose gel in 1x Tris borate buffer (TBE) with 4  $\mu$ L of GoodView Nucleic Acid Stain-HGV-II (SBS Genetech, China) and the DNA Ladder (Invitrogen, USA) was used for estimating the length of products. Electrophoresis was performed in the conditions of 80 V for 90 min (PowerPac™, Bio-Rad Laboratories Inc., USA). After separation, DNA fragments were visualized using an UV-Transilluminator MUV 21-312-220 (Major Science, USA) at a wavelength of 254 nm. Results are shown in the **Figure S3**.

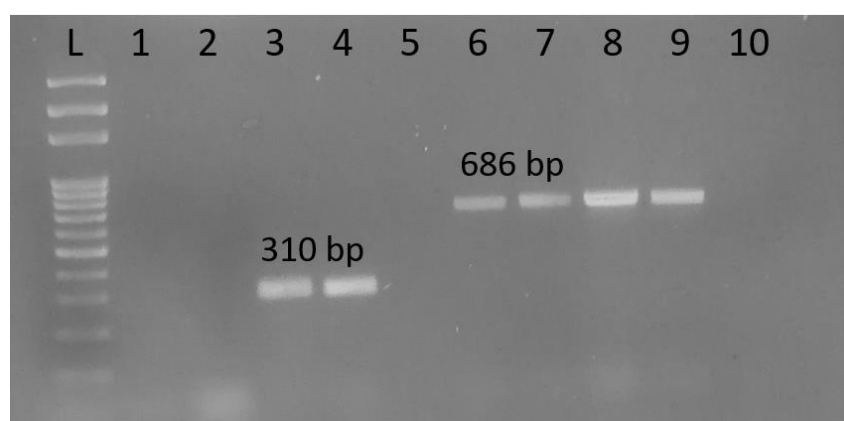

**Figure S3.** PCR detection of *mecA* and *femA* genes in isolates of *S. aureus*: L – 100- 2000 kb DNA Ladder; 1. - *mecA* MSSA1; 2. - *mecA* MSSA2; 3. - *mecA* MRSA1; 4. - *mecA* MRSA2; 5. - *mecA* negative control; 6. - *femA* MSSA1; 7. - *femA* MSSA2; 8. - *femA* MRSA1; 9. - *femA* MRSA2; 10. - *femA* negative control.

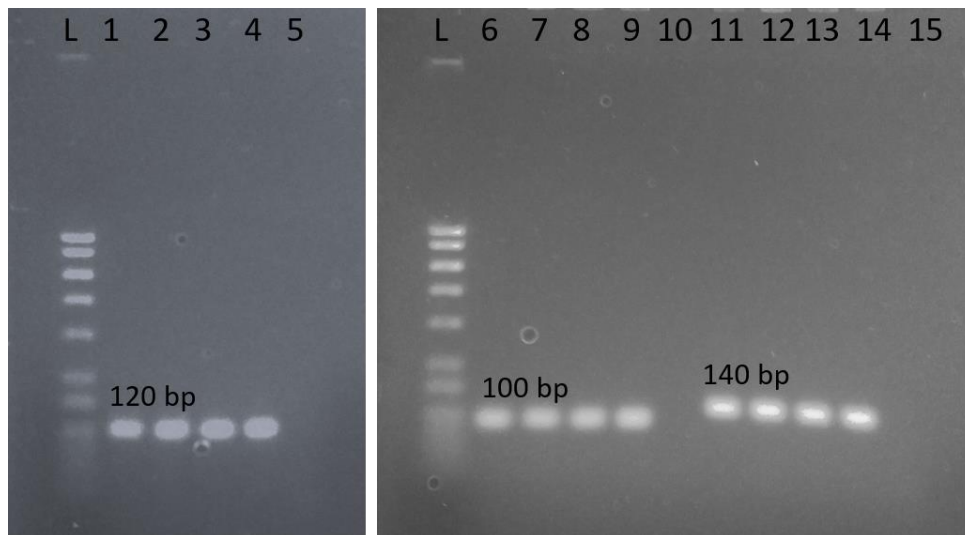

**Figure S4.** PCR detection of *norA*, *B*, *C* genes in isolates of *S. aureus*: L – DNA ladder (25-700 bp); 1. – *norA* MSSA1; 2. – *norA* MSSA2; 3. – *norA* MRSA1; 4. – *norA* MRSA2; 5. – *norA* negative control; 6 - *norB* MSSA1; 7. - *norB* MSSA2; 8. - *norB* MRSA1; 9. - *norB* MRSA2; 10. - *norB* negative control; 11. - *norC* MSSA1; 12. - *norC* MSSA2; 13. - *norC* MRSA1; 14. - *norC* MRSA2; 15. - *norC* negative control.

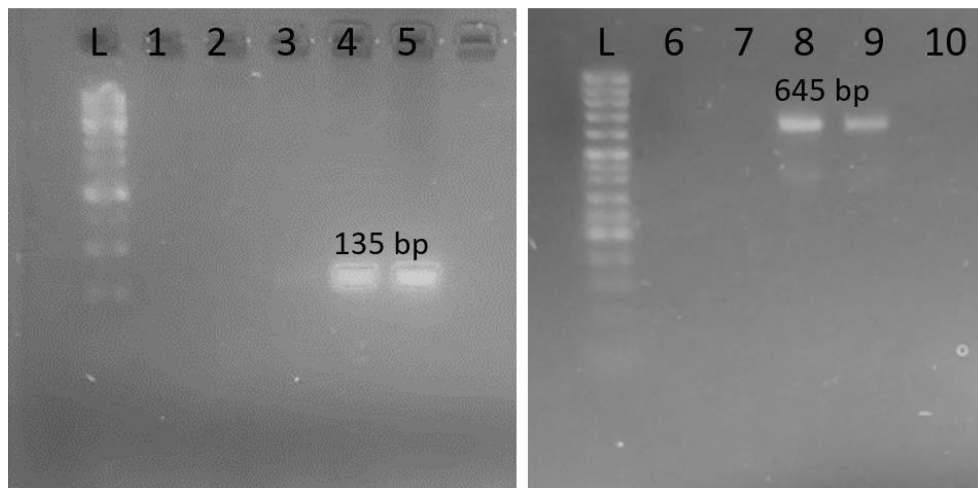

**Figure S5.** PCR detection of *ant(4')-Ia* and *ermA* genes in isolates of *S. aureus*: L – 100- 2000 kb DNA Ladder; 1. – *ant(4')-Ia* negative control; 2. – *ant(4')-Ia* MSSA1; 3. – *ant(4')-Ia* MSSA2; 4. *ant(4')-Ia* MRSA1; 5. – *ant(4')-Ia* MRSA2; 6 – *ermA* MSSA1; 7 - *ermA* MSSA2; 8 - *ermA* MRSA1; 9 - *ermA* MRSA2; 10 - *ermA* negative control.

**Table S1.** List of oligonucleotide sequences used in this study. All primers were synthesized by Metabion International AG, Germany.

| Gene        |         | Sequence 5' - 3'                     | Amplicon size | Reference                   |
|-------------|---------|--------------------------------------|---------------|-----------------------------|
| <i>femA</i> | forward | CTT ACT TAC TGG CTG TAC CTG          | 686 bp        | Vannuffel et al., 1999 [34] |
|             | reverse | ATG TCG CTT GTT ATG TGC              |               |                             |
| <i>mecA</i> | forward | GTA GAA ATG ACT GAA CGT<br>CCG ATA A | 310 bp        |                             |

|                         |         |                                           |        |                                   |
|-------------------------|---------|-------------------------------------------|--------|-----------------------------------|
|                         | reverse | CCA ATT CCA CAT TGT TTC GGT<br>CTA A      |        | Martineau<br>et al., 2000<br>[72] |
| <i>norA</i>             | forward | TGC CTG GTG TGA CAG GTT TA                | 120 bp | Kong et al.,<br>2017 [32]         |
|                         | reverse | AAT CCA CCA ATG CCT GGT CC                |        |                                   |
| <i>norB</i>             | forward | ATG GAA AAG CCG TCA AGA<br>GA             | 110 bp | Kong et al.,<br>2017 [32]         |
|                         | reverse | AAC CAA TGA TTG TGC AAA<br>TAG C          |        |                                   |
| <i>norC</i>             | forward | ATG AAT GAA ACG TAT CGC GG                | 120 bp | Kong et al.,<br>2017 [32]         |
|                         | reverse | GTC TGC ACC AAA ACT TTG<br>TTG TAA A      |        |                                   |
| <i>ant(4')-Ia</i>       | forward | AAT CGG TAG AAG CCC AA                    | 135 bp | Choi et al.,<br>2003 [73]         |
|                         | reverse | GCA CCT GCC ATT GCT A                     |        |                                   |
| <i>aph(3')-III</i>      | forward | AAA TAC CGC TGC GTA                       | 242 bp | Choi et al.,<br>2003 [73]         |
|                         | reverse | CAT ACT CTT CCG AGC AA                    |        |                                   |
| <i>aac(6')-aph(2'')</i> | forward | GAA GTA CGC AGA AGA GA                    | 491 bp | Choi et al.,<br>2003 [73]         |
|                         | reverse | ACA TGG CAA GCT CTA GGA                   |        |                                   |
| <i>ermA</i>             | forward | TCT AAA AAG CAT GTA AAA<br>GAA            | 645 bp | Sutcliffe et<br>al., 1996<br>[74] |
|                         | reverse | CTT CGA TAG TTT ATT AAT ATT<br>AGT        |        |                                   |
| <i>ermB</i>             | forward | GAA AAG GTA CTC AAC CAA<br>ATA            | 639 bp | Sutcliffe et<br>al., 1996<br>[74] |
|                         | reverse | AGT AAC GGT ACT TAA ATT<br>GTT TAC        |        |                                   |
| <i>ermC</i>             | forward | TCA AAA CAT AAT ATA GAT<br>AAA            | 642 bp | Sutcliffe et<br>al., 1996<br>[74] |
|                         | reverse | GCT AAT ATT GTT TAA ATC GTC<br>AAT        |        |                                   |
| <i>msrA</i>             | forward | GGC ACA ATA AGA GTG TTT<br>AAA GG         | 939 bp | Ojo et al.,<br>2006 [75]          |
|                         | reverse | AAG TTA TAT CAT GAA TAG<br>ATT GTC CTG TT |        |                                   |
| <i>msrB</i>             | forward | TAT GAT ATC CAT AAT AAT<br>TAT CCA ATC    | 595 bp | Rossato et<br>al., 2020<br>[76]   |
|                         | reverse | AAG TTA TAT CAT GAA TAG<br>ATT GTC CTG TT |        |                                   |
